# Supplementary material for: Loneliness in Psychosis: A Meta-analytical Review
Source: Oxford University Press journal article supplement (doi:10.1093/schbul/sbx036), 2017-02-24
Supplement: sbx036_suppl_supplementary_material.doc [file sbx036_suppl_supplementary_material.doc]

**Supplementary Material**

List of content

Appendix A – Study Quality Assessment Tool

Appendix B – GRADE assessment of all outcomes

Appendix C– A list of excluded studies

Appendix D – PRISMA checklist

**Appendix A** - Study Quality Assessment Tool

This is an adapted version of a tool for assessing the methodological quality of observational studies that has been successfully employed in prior research undertaken by the Agency for Healthcare Research and Quality (AHRQ). Each study is assessed on a range of methodological quality criteria that are rated as being met, not met, partially met, or being unclear. This tool has been followed closely from Taylor et al., (2015).

In the current study scale-based or aggregated study quality rating was not performed, based on the guidance of experts in the field of meta-analysis. Quality assessments were presented descriptively to guide the interpretation of findings, rather than used as a means to weight or adjust aggregated effect sizes. The tool we applied is presented below.

*General instructions: Grade each criterion as ‘Yes’, ‘No’, ‘Partially’, or ‘Can’t tell’. Factors to consider when making an assessment are listed under each criterion. Where appropriate (particularly when assigning a ‘No’, ‘Partially’, or ‘Can’t tell’ score), please provide a brief rationale for your decision (in parentheses) in the evidence table.*

1. Unbiased selection of the cohort?

Factors that help reduce selection bias:

○ Inclusion/exclusion criteria:

○ Recruitment strategy

▪ Clearly described

▪ Criteria for inclusion in psychosis/delusions and comparison groups clearly outlined.

▪ Relatively free from bias (selection bias might be introduced, for example, by recruitment via advertisement).

2. Selection minimizes baseline differences in prognostic factors?

Factors to consider:

○ Was selection of the comparison group appropriate?

○ Is the comparison group matched with the clinical group on key demographics (that is age and gender)?

3. Sample size calculated?

Factors to consider:

○ Did the authors report conducting a power analysis or describe some other basis for determining the adequacy of study group sizes for the primary outcome(s) of interest to us?

○ Where a power calculation is presented, do the final numbers obtained match up to this (for example, within 10% of required numbers)?

4. Adequate description of the cohort?

Consider whether the cohort is well-characterized in terms of baseline:

○ Age

○ Sex

○ Ethnicity

○ Diagnosis/clinical status

5. Validated method for ascertaining psychotic disorder or delusions?

Factors to consider:

○ Was the method used to ascertain exposure clearly described (details should be sufficient to permit replication in new studies)?

○ Was a valid and reliable measure used to ascertain exposure (subjective measures based on self-report tend to have lower reliability and validity than objective measures such as clinical interview)? Likewise, relying on medical notes is likely to introduce bias due to variation in how assessment is undertaken.

6. Validated method for ascertaining ‘jumping to conclusions’?

Factors to consider:

○ The beads task or a conceptually equivalent variant should be used

○ Were these measures implemented consistently across all study participants?

○ Were several trials and/or a practice run included in the procedure?

7. Outcome assessment blind to exposure?

Factors to consider:

○ Were the study investigators who assessed outcomes blind to whether participants had a psychotic disorder or delusions (this criterion will not apply in the case of Internet-based or automated designs where a researcher is not present)?

8. Adequate handling of missing data?

Factors to consider:

○ Are the details of missing data clearly reported, including how missing data was handled in the analyses? If not, is there any reason to believe missing data was present (for example, lower N in analysis than initially reported in the participants section).

○ Did missing data from any group exceed 20%?

○ If missing data was present and substantial, were steps taken to minimize bias (for example, sensitivity analysis or imputation).

**Appendix B -** GRADE assessment of all outcomes

Method

Quality assessments were conducted independently by two reviewers - one reviewer (BM) assessed all of the studies while the second reviewer (EV) assessed a proportion of studies, with any disagreements resolved through discussion with the third author (PH).

For assessment of outcome quality, we downgraded by 1 point if two of the parameters in our quality assessment had ≥50% studies with at least one ‘no’ or ‘unclear’ rating, and 2 points if three parameters had ≥50% studies with ratings of ‘no or unclear’.

We downgraded by 1 point for inconsistency if the I2 statistic was ≥40% in the context of an unclear direction of effect or ≥75% in the context of a clear direction of effect. We downgraded by 2 points if the I2 statistic was ≥75% in the context of an unclear direction of effect. We downgraded an outcome for imprecision if “a recommendation or clinical course of action would differ if the upper versus the lower boundary of the CI represented the truth” and / or the number of events and sample size meant the optimal information size was not reached.

We downgraded for publication bias when funnel-plot suggested asymmetry which would be confirmed in the Egger's regression test and the Rank correlation test, and this was not better explained by selective reporting bias or some other factor.

Outcome

Based on the following criteria we downgraded the overall outcome by 1 point due to the high heterogeneity as indicated by the I2 statistic.

**Appendix C -** A list of excluded studies

The following table presents studies excluded after inspection of the full-text report, or via correspondence with authors. Studies excluded on basis of title or abstract alone are not detailed as these are too numerous.

| **Study** | **Reason for exclusion** |
| --- | --- |
| Andersson G., Denhov A., Bulow P., Topor A., 2015 | Qualitative study |
| Barut, Jennifer K., Dietrich, Mary S Zanoni, Paul A,  Ridner, Sheila H., 2015 | Qualitative study |
| Bebbington P, Wilkins S, Sham P, et al. 1996 | Loneliness not measured |
| Beebe L.H., 2010 | Qualitative study |
| Behrendt R.P., 2006 | Not empirical |
| Bengtsson-Tops A, Hansson L., 2001 | Loneliness not measured |
| Birnbaum M.L., 2010 | Qualitative study |
| Brown, C 1996 | Not specific to psychosis |
| Corrigan, P. W., & Phelan, S. M., 2004 | Loneliness not measured |
| Cresswell CM, Kuipers L, Power MJ, 1992 | Loneliness not measured |
| Davidson, L; Stayner, D., 1997 | Qualitative study |
| De Niro, Dorothy Ann Nejedlo, 1993 | Qualitative study |
| De Niro D.A., 1995 | Qualitative study |
| de Pater, Margreet, 2012 | Qualitative study |
| Doman, L. C. H.; Roux, A le., 2010 | Not empirical |
| Druz, VF; Budza, VG; Oleinikova, IN; Medvedev, VA., 1998 | Not in English |
| Druz, VF; Oleinikova, IN., 2000 | Not in English |
| Elisha D., Castle D., Hocking B., 2006 | Not specific to psychosis |
| Erdner A., Nystrom M., Severinsson E., Lutzen K., 2002 | Qualitative study |
| Evert, H; Harvey, C; Trauer, T; Herrman, H., 2003 | Loneliness not measured |
| Freeman, D., Gittins, M., Pugh, K., Antley, A., Slater, M.,  Dunn, G., 2008 | Non-clinical sample |
| Gerstein, 1987 | Psychotic symptoms not measured, control group limited to lonely people |
| Graham C, Arthur A and Howard R (2002) | Loneliness not measured |
| Granerud, A.; Severinsson, E., 2006 | Qualitative study |
| Gruzelier J.H., 1996 | Loneliness not measured |
| Hamilton NG, Ponzoha CA, Cutler DL, Weigel RM., 1989 | Loneliness not measured |
| Harvey C.A. Brophy L., 2011 | Not empirical |
| Honkonen, T; Saarinen, S; Salokangas, RKR., 1999 | Loneliness not measured |
| Jablensky A, Mcgrath J, Herrman H, et al. (1999) | Loneliness not measured |
| Kudo J., Mori H., Gomibuchi T., 2002 | Qualitative study |
| Lamster F.G., Nittel C., Lincoln T., Kircher T. et al., 2015 | Non-clinical sample |
| Lim, M., Gleeson, J., 2014 | Not empirical |
| Linz, Sheila J.; Sturm, Bonnie A., 2013 | Not empirical |
| Lysaker PH, Davis LW (2004) | Loneliness not measured |
| Macdonald EM, Hayes RL, Baglioni AJ., 2000 | Loneliness not measured |
| Maltsberger JT., Pompili M., Tatarelli R., 2006 | Qualitative study |
| Morgan V.A., Jablensky A.V., Waterreus A., Bush R. et al.,2011 | Abstract only, published elsewhere |
| Morgan, V.A., Waterreus, A., Jablensky, A., Mackinnon, A., et al, 2012 | Loneliness not measured |
| Murphy, S; Murphy, J; Shevlin, M., 2015 | Non-clinical sample  (uses psychotic-like symptom  screen but no diagnoses) |
| Nilsson B., Naden D., Lindstrom U.A., 2008 | Qualitative study |
| Perese E, Marilee, W., 2005 | Loneliness not measured |
| Riggio, HR., Kwong, WY., 2011 | Non-clinical sample |
| Riggio, HR., Kwong, WY., 2009 | Non-clinical sample |
| Romney, D.M., 1995 | Loneliness not measured |
| Salokangas RK., 1997 | Loneliness not measured |
| Schwartz et al., 2009 | No measure of psychotic symptoms, no healthy control group |
| Sorensen, Leif V Mors, Ole., 1992 | Loneliness not measured |
| Sundermann, O Onwumere, J Bebbington, P Kuipers, E., 2013 | Not empirical |
| Talarowska-Bogusz, Monika; Florkowski, Antoni; Zboralski, Krzysztof; Cieslak, Katarzyna; Galecki, Piotr., 2008 | Loneliness not measured |
| Tharayil D., 2005 – unpublished thesis dissertaton | Qualitative study |
| Tharayil, 2007 | No measure of psychotic symptoms, no control group |
| Westermann S., Lincoln T.M., 2010 | Loneliness not measured |
| Van Der Werf M.Van Winkel R. Van Os J., 2010 | Conference abstract, published elsewhere |
| Boyda et al., 2015 | reuse of the same sample |
| McManus et al., 2009 | reuse of the same sample |
| Shevlin et al., 2015 | reuse of the same sample |
| Stain et al., 2012 | reuse of the same sample |
| Switaj et al., 2014 | reuse of the same sample |
| Wciorka et al., 2015 | reuse of the same sample |
| Borge et al., 1999 | Relevant correlation data not provided / no contact with author |
| Cohen et al.,1997 | Relevant correlation data not provided / no contact with author |
| Pjescic et al., 2014 | Relevant correlation data not provided / no contact with author |
| Tylova et al., 2013 | Abstract only, relevant data not provided / no contact with author |
| Young et al., 2015 | Baseline data not accessible / no answer from the author |
| Van der Werf et al., 2010 | Relevant data not provided on request |

**Appendix D** - PRISMA checklist

| **Section/topic** |  | **Checklist item** | **Reported on page** |
| --- | --- | --- | --- |
| **TITLE** | | |  |
| Title | 1 | Identify the report as a systematic review, meta-analysis, or both. | 1 |
| **ABSTRACT** | | |  |
| Structured summary | 2 | Provide a structured summary including, as applicable: background; objectives; data sources; study eligibility criteria, participants, and interventions; study appraisal and synthesis methods; results; limitations; conclusions and implications of key findings; systematic review registration number. | 2 |
| **INTRODUCTION** | | |  |
| Rationale | 3 | Describe the rationale for the review in the context of what is already known. | 3 |
| Objectives | 4 | Provide an explicit statement of questions being addressed with reference to participants, interventions, comparisons, outcomes, and study design (PICOS). | 5 |
| **METHODS** | | |  |
| Protocol and registration | 5 | Indicate if a review protocol exists, if and where it can be accessed (e.g., Web address), and, if available, provide registration information including registration number. | 11 |
| Eligibility criteria | 6 | Specify study characteristics (e.g., PICOS, length of follow-up) and report characteristics (e.g., years considered, language, publication status) used as criteria for eligibility, giving rationale. | 6-7 |
| Information sources | 7 | Describe all information sources (e.g., databases with dates of coverage, contact with study authors to identify additional studies) in the search and date last searched. | 6 |
| Search | 8 | Present full electronic search strategy for at least one database, including any limits used, such that it could be repeated. | 6 |
| Study selection | 9 | State the process for selecting studies (i.e., screening, eligibility, included in systematic review, and, if applicable, included in the meta-analysis). | Figure 1. p. 9 |
| Data collection process | 10 | Describe method of data extraction from reports (e.g., piloted forms, independently, in duplicate) and any processes for obtaining and confirming data from investigators. | 7-8 |
| Data items | 11 | List and define all variables for which data were sought (e.g., PICOS, funding sources) and any assumptions and simplifications made. | 7, appendix A |
| Risk of bias in individual studies | 12 | Describe methods used for assessing risk of bias of individual studies (including specification of whether this was done at the study or outcome level), and how this information is to be used in any data synthesis. | 9 |
| Summary measures | 13 | State the principal summary measures (e.g., risk ratio, difference in means). | 11 |
| Synthesis of results | 14 | Describe the methods of handling data and combining results of studies, if done, including measures of consistency (e.g., I2) for each meta-analysis. | 18 |
